# Supplementary material
Source: PubMed Central journal article supplement (PMC4717192)

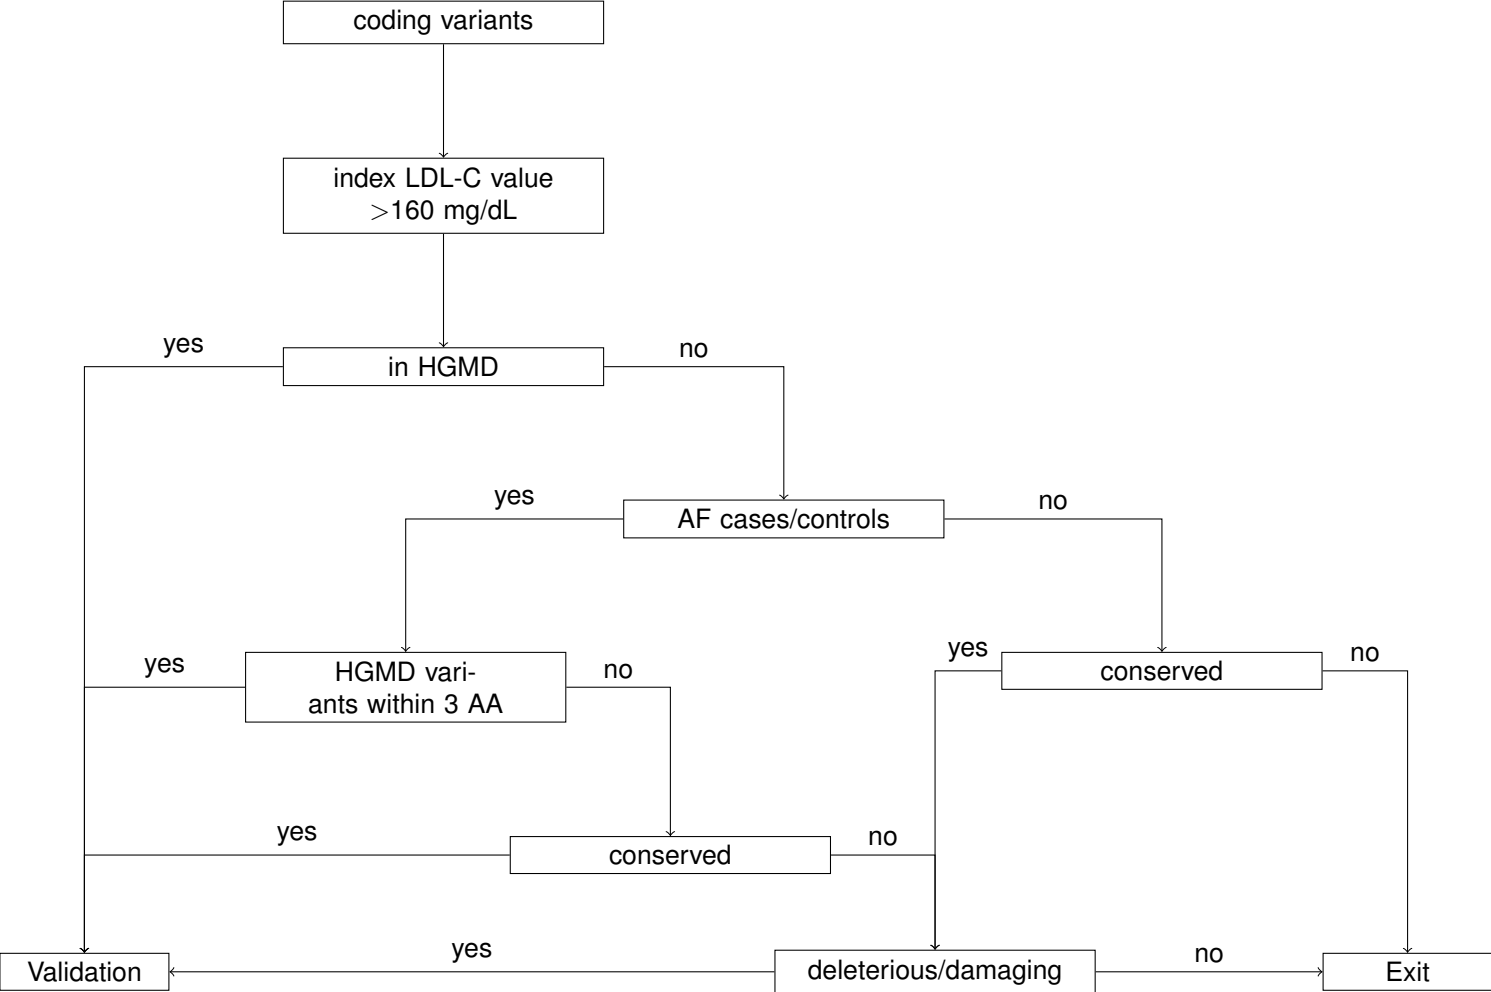

Supplement: ejhg2015100x1.pdf [file ejhg2015100x1.pdf]

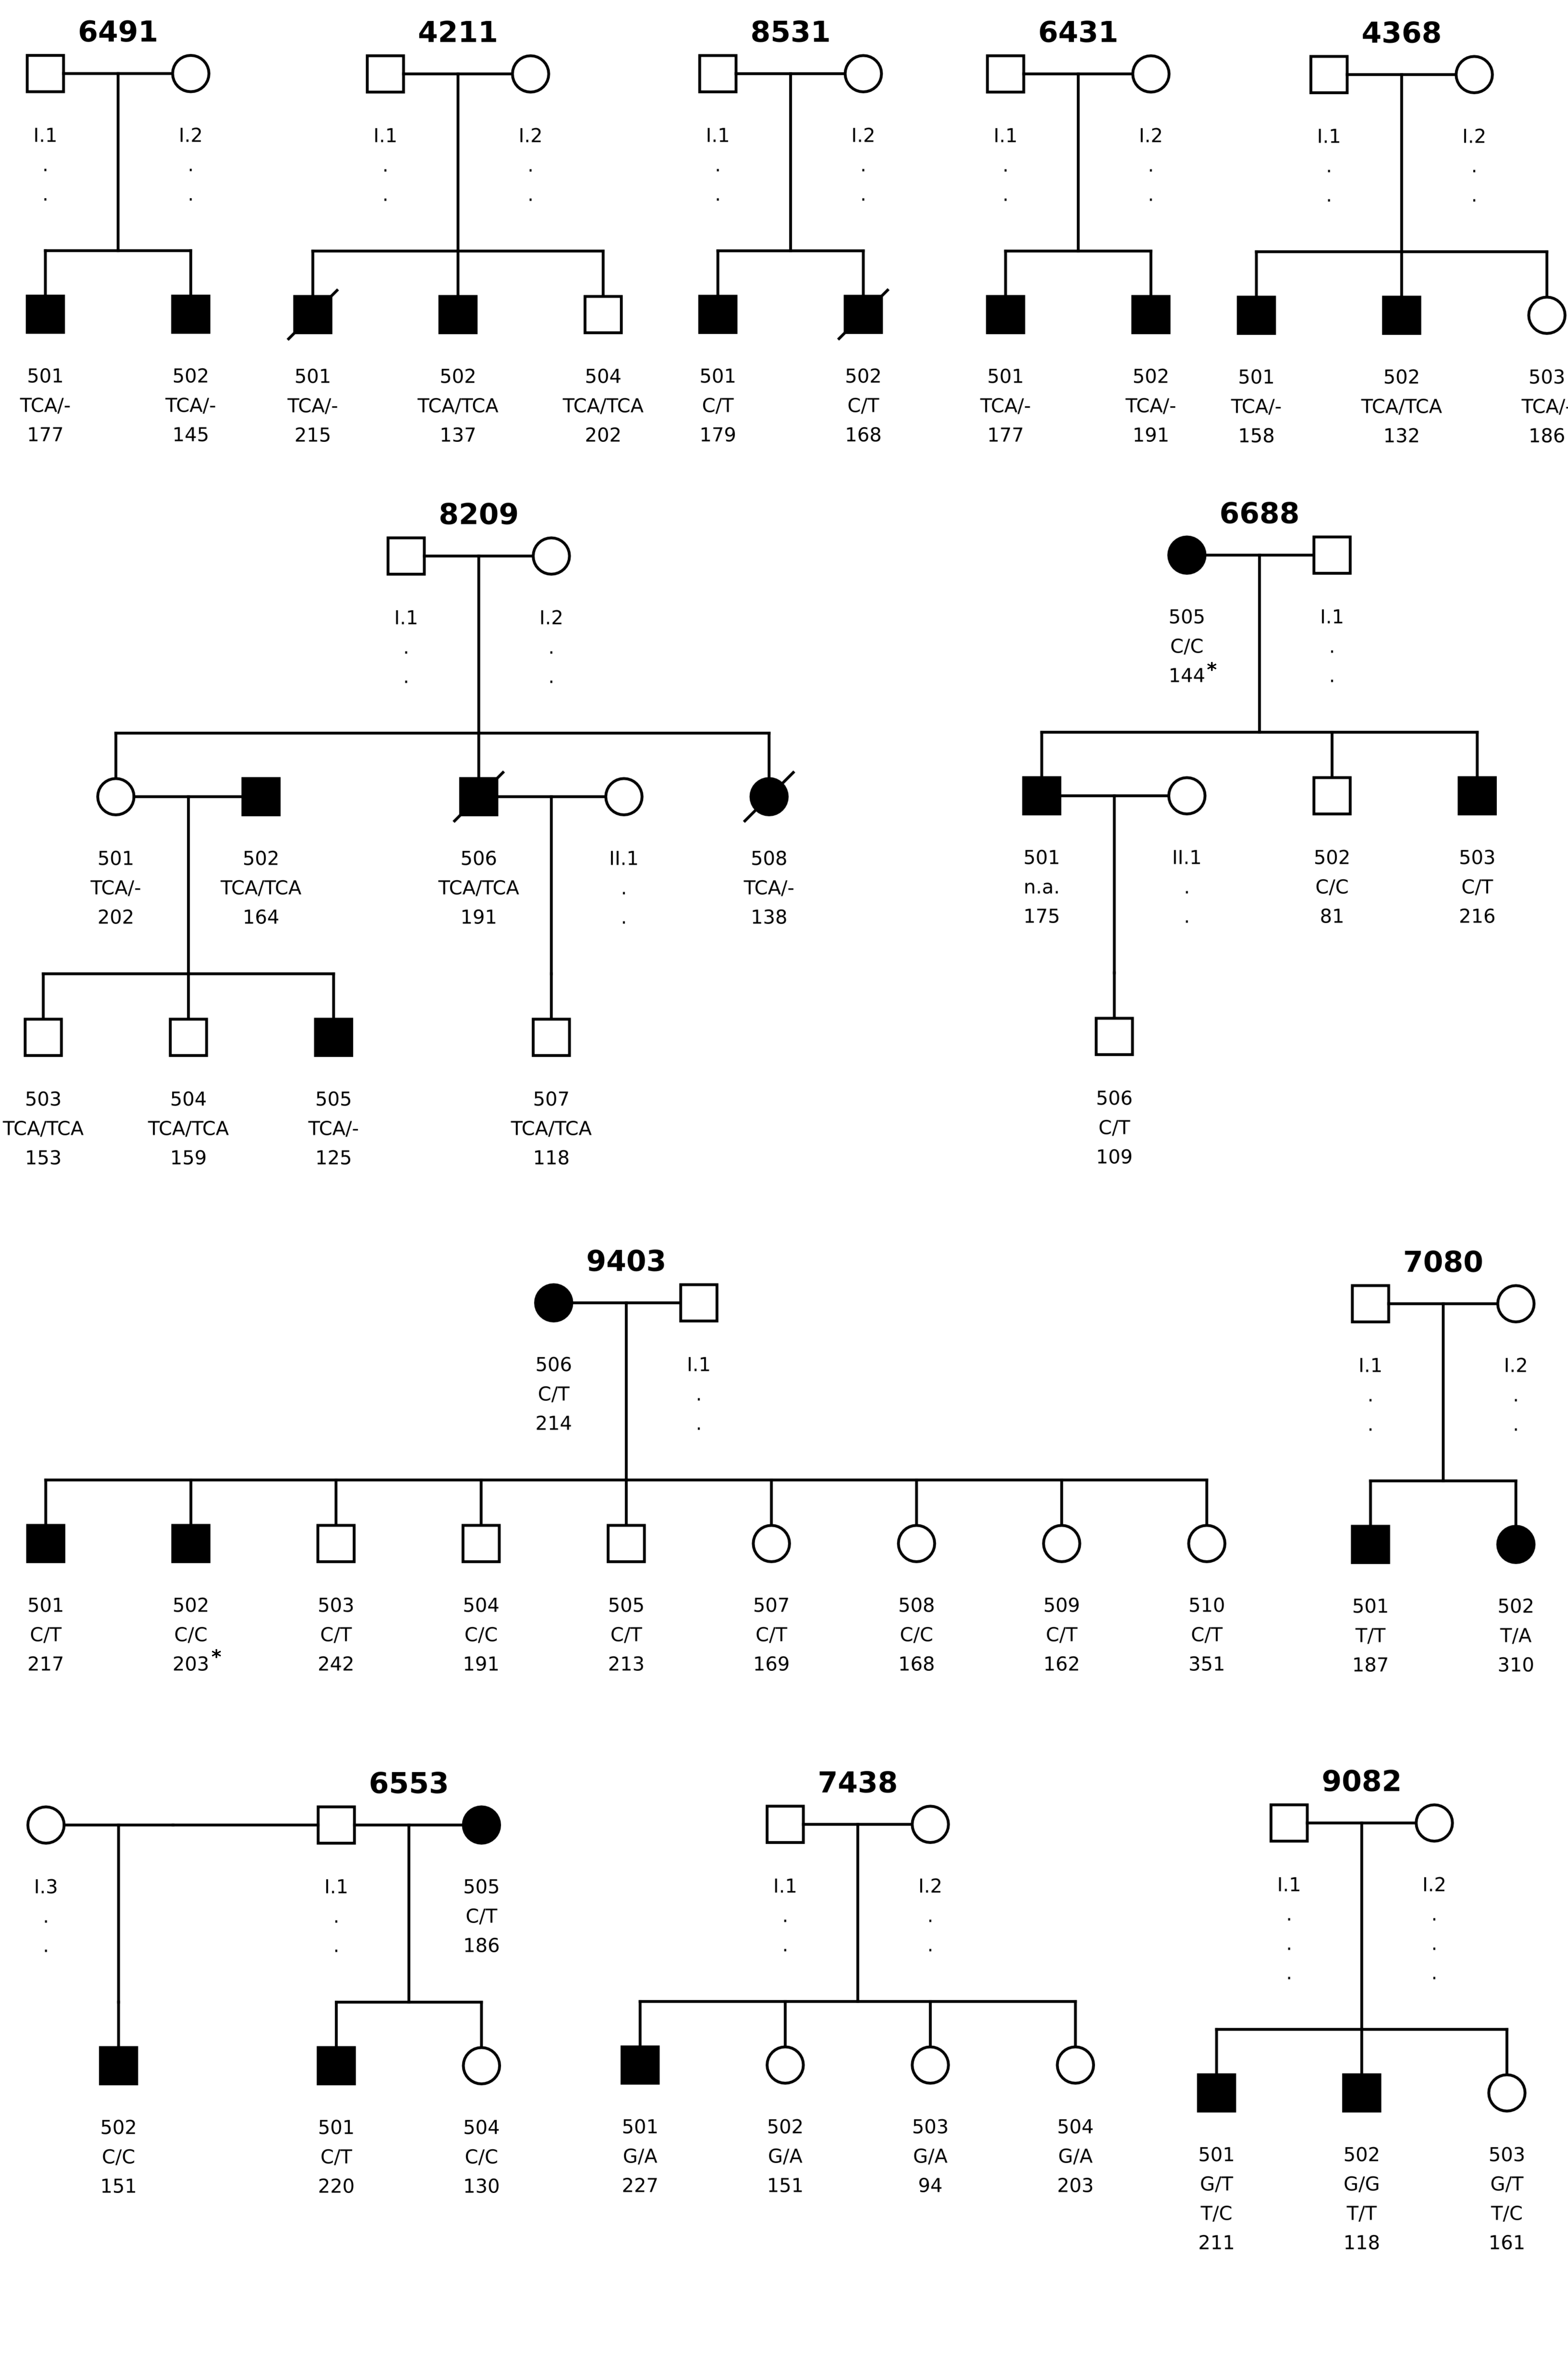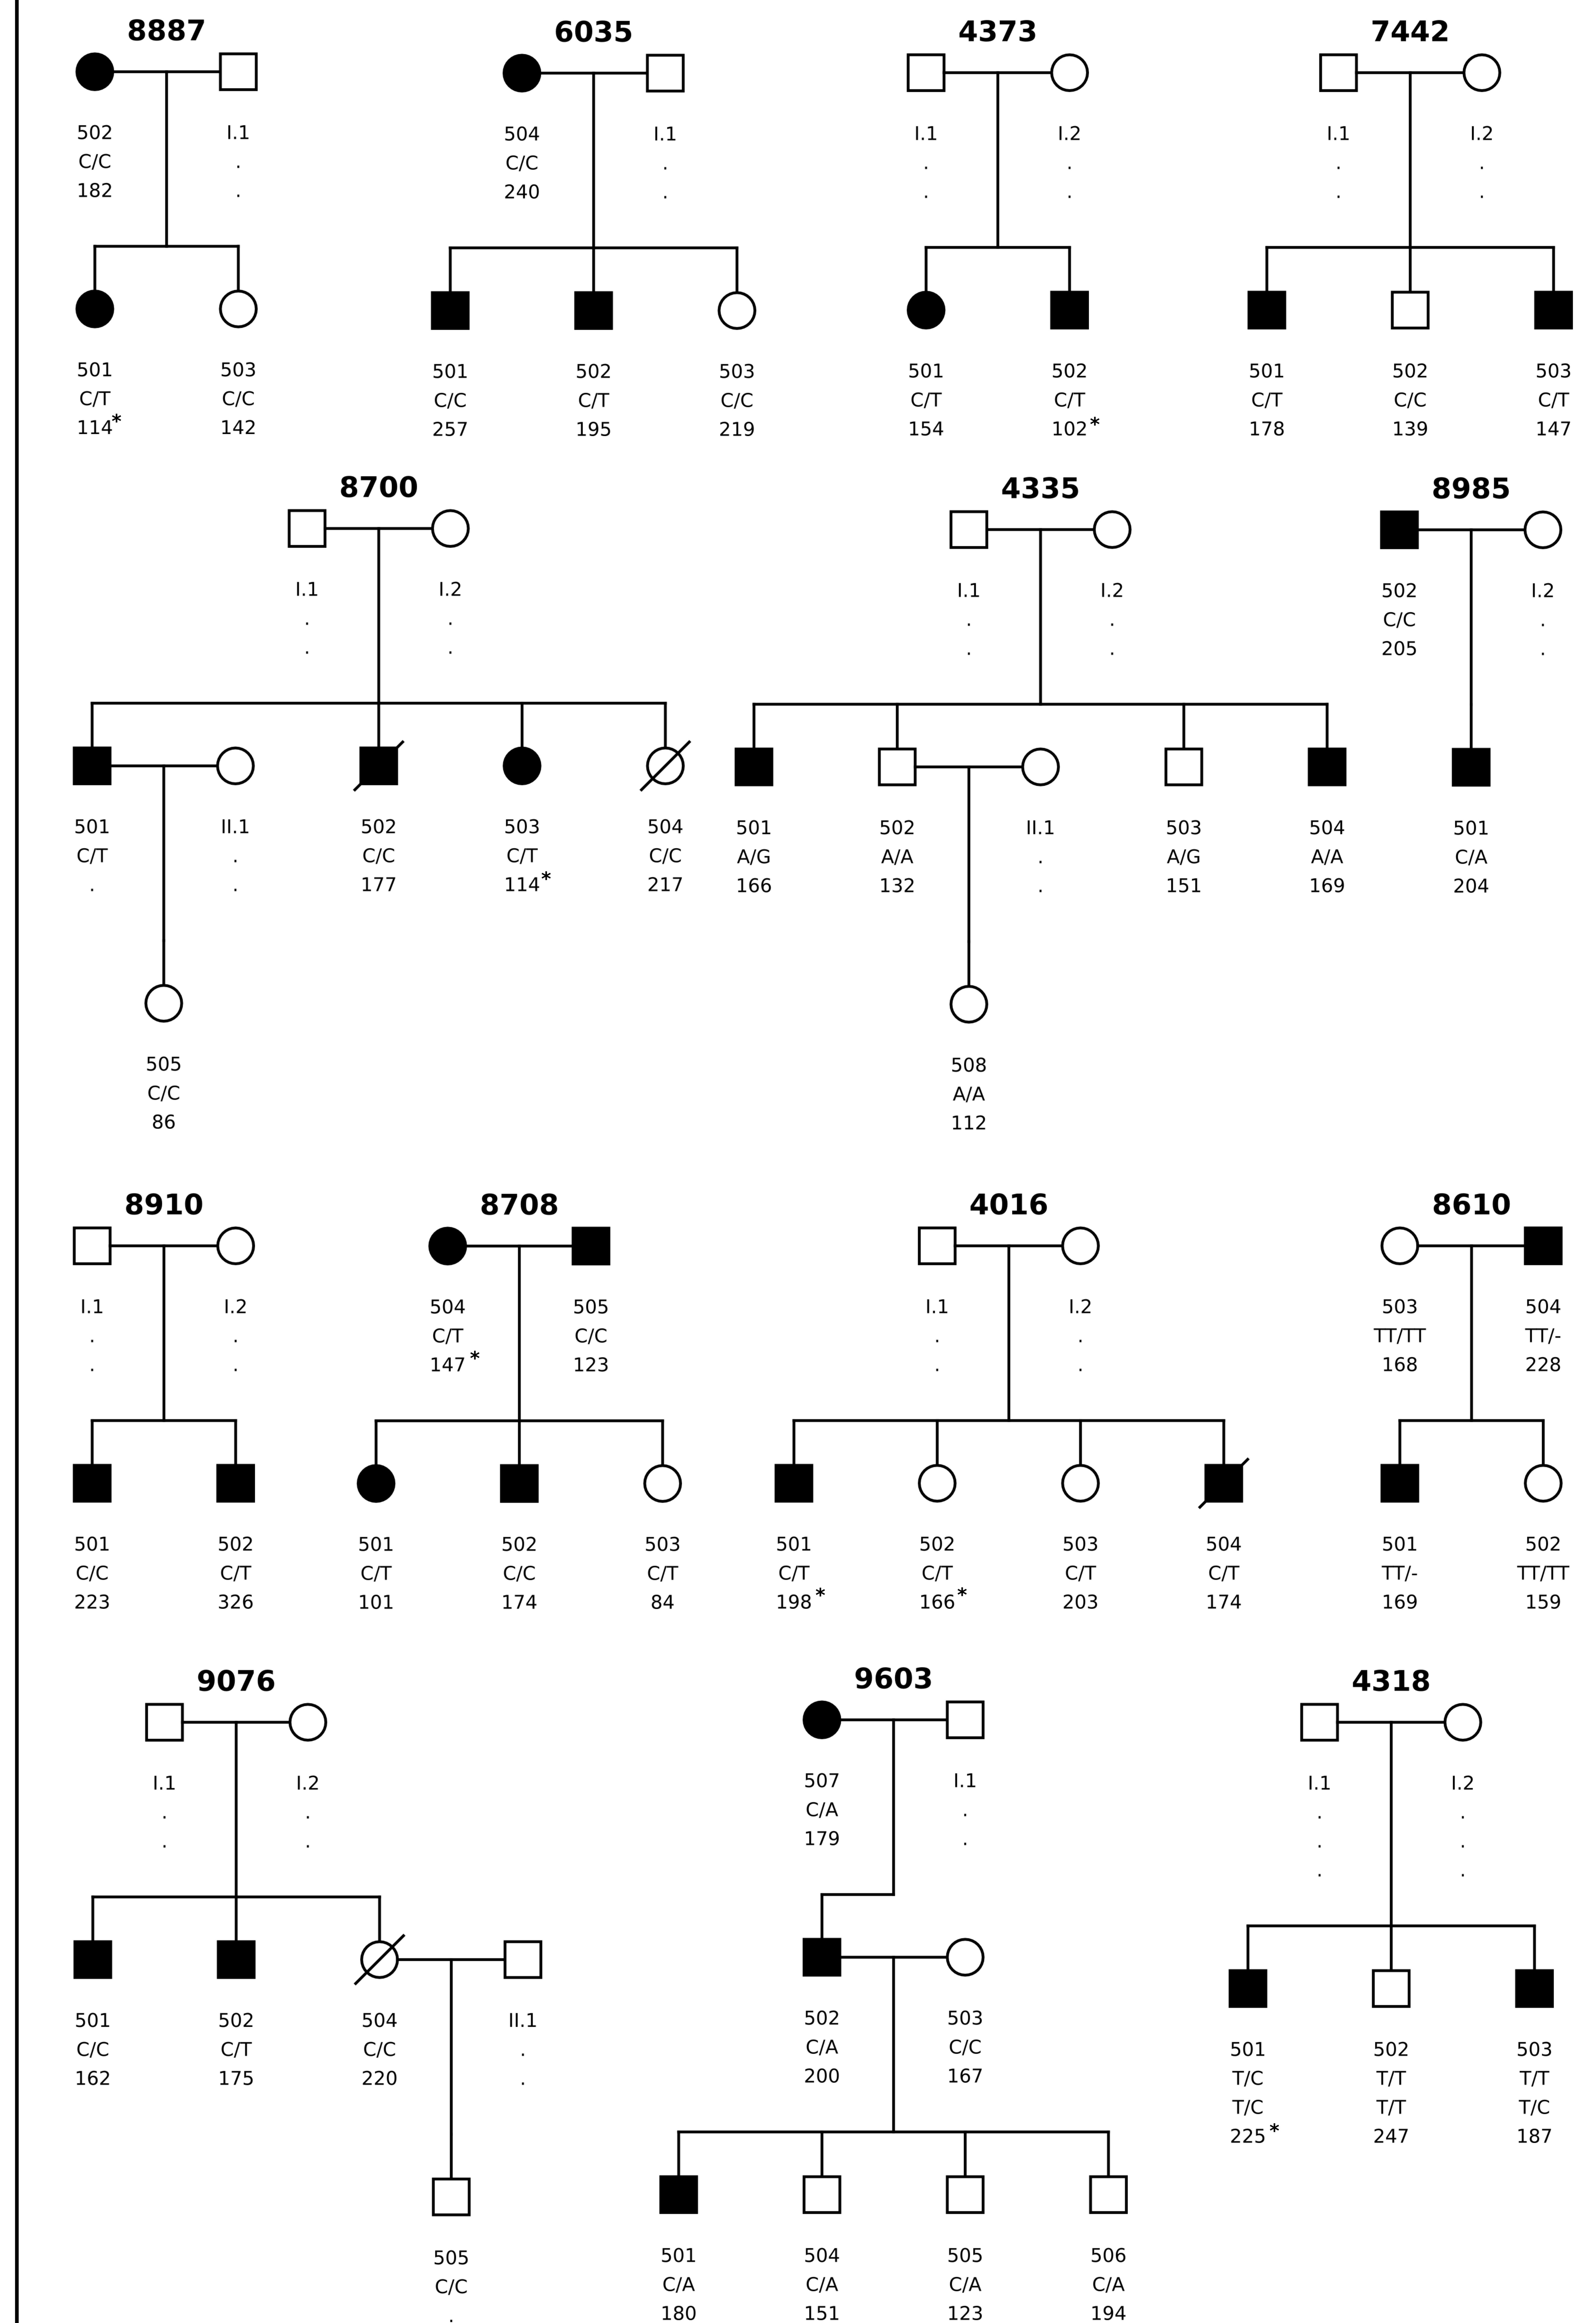

Supplement: ejhg2015100x2.pdf [file ejhg2015100x2.pdf]
